# Supplementary material for: Cauliflower Mosaic Virus TAV, a Plant Virus Protein That Functions like Ribonuclease H1 and is Cytotoxic to Glioma Cells
Source: Hindawi journal article supplement (doi:10.1155/2020/7465242), 2020-01-01
Supplement: f1 [file 7465242.f1.pdf]

## **Supplementary Materials**

**Supplementary Table 1:** Characterization of CaMV proteins and of their putative interactions with human proteins and nucleic acids. Together with Figure Fig. 1a and Supplementary Table 3, these data give a whole overview of possible human proteins interactors with CaMV proteins.

**Supplementary Table 2:** RNA interacting sites in TAV inferred from the modeling procedure. These data complete the model presented in Figure 1b.

**Supplementary Table 3:** Proteins interacting with CaMV TAV in plants and corresponding proteins in human.

**Supplementary Figure 1:** Full length blot/gel related to Fig. 2a.

**Supplementary Figure 2:** Full length blot/gel related to Fig. 2b

**Supplementary Figure 3:** Western blot detection of GAPDH and Histone H3 as cytoplasmic/nuclear separation controls.

**Supplementary Figure 4:** Residues putatively involved in binding DNA and RNA have been predicted with the machine-learning method DP-Bind and are presented in this figure.

|    | UniprotKB<br>in <i>CaMV</i> | Functional features<br>in plants                                                                                               | Structural features                                                                                                | Predicted DNA<br>and RNA binding<br>sites | Similar<br>human<br>protein | Possible human<br>protein interactors                                                                                                                                                           |
|----|-----------------------------|--------------------------------------------------------------------------------------------------------------------------------|--------------------------------------------------------------------------------------------------------------------|-------------------------------------------|-----------------------------|-------------------------------------------------------------------------------------------------------------------------------------------------------------------------------------------------|
| P1 | P03546                      | Movement protein<br>(MP) Transport of<br>virus in host, cell to<br>cell                                                        | Coiled-coil<br>domains<br>Homotrimer<br>No PDB<br>Interacts with<br>plant Prenylated<br>Rab acceptor<br>protein 1D | Yes                                       | None                        | Prenylated Rab<br>acceptor protein 1<br>(by similarity with<br>plant protein) and<br>its 30 interactors,<br>including<br>syntaxins and<br>members of RAS<br>family (from<br>STRING<br>database) |
| P3 | P03551                      | Virion-associated<br>protein (VAP)<br>DNA-binding                                                                              | Coiled-coil<br>domains<br>Homotetramer<br>PDB: 3F6N, 3K4t                                                          | Yes                                       | None                        | None                                                                                                                                                                                            |
| P4 | P03543                      | Capsid protein (CP)<br>Viral penetration<br>into host nucleus.<br>Nuclear<br>Localization Signal                               | Contains Zn-<br>finger motif<br>Self-assemble into<br>420-mer capsid<br>No PDB                                     | Yes                                       | None                        | Importin-alpha<br>(based on the<br>presence of a<br>Nuclear<br>Localization<br>Signal)                                                                                                          |
| P5 | P03555                      | Enzymatic<br>polyprotein (EP):<br>endopeptidase<br>activity,<br>endonuclease<br>activity, reverse<br>transcriptase<br>activity | Reverse<br>transcriptase and<br>protease domains<br>No PDB                                                         | Yes                                       | None                        | None                                                                                                                                                                                            |
| P6 | P03558                      | Transactivator-<br>viroplasmin (TAV)<br>Translation<br>regulation<br>Nuclear localization<br>signal                            | A domain can be<br>modelled using<br>RNase H1                                                                      | Yes                                       | RNase H1                    | See<br>Supplementary<br>Table 3                                                                                                                                                                 |

**Table S1:** Characterization of CaMV proteins and of their putative interactions with human proteins and nucleic acids. UniProtKB codes of CaMV proteins are reported. Structural and functional features are retrieved from UniProtKB entries. Possible interactions with nucleic acids are computed with DP-pred. Human proteins sharing similarity have been retrieved with a Blast search against UniProtKB setting a 10<sup>-3</sup> threshold on the e-value. Human interactors are inferred on the basis of sequence similarity with viral proteins or with known plant interactors and are analysed in the context of the STRING human interactome (protein data bank, PDB).

| 3BSU (template) | TAV protein (target) | Conservation |
|-----------------|----------------------|--------------|
| TRP 43          | TRP 155              | Conserved    |
| ARG 47          | LYS 159              | Similar      |
| ARG 52          | GLY 164              | Non similar  |
| PRO 54          | PRO 166              | Conserved    |
| ALA 55          | GLY 167              | Similar      |
| ALA 56          | VAL 168              | Similar      |
| ARG 57          | ALA 169              | Non similar  |
| PHE 58          | TYR 170              | Similar      |
| LYS 59          | LYS 171              | Conserved    |
| LYS 60          | LYS 172              | Conserved    |

**Table S2:** RNA interacting sites in TAV inferred from the modelling procedure. The 10 residues of TAV interacting with RNA are listed. 4 out of 10 residues are conserved between target and template, while 4 more are substituted with similar residues.

| Plant protein                                                             | Human analogous                                    | Seq. Id. % / Coverage %       | KEGG Pathway (Human protein)                                               |
|---------------------------------------------------------------------------|----------------------------------------------------|-------------------------------|----------------------------------------------------------------------------|
| Elongation factor P-TEFb<br>CDKC1 (Q9LFT8)<br>CDKC1 (Q8W4P1)              | CDK9 (P50750)<br>CDK9 (P50750)                     | 47 / 64<br>47 / 63            | Transcriptional mis-regulation in cancer                                   |
| Initiation factors<br>eIF3g (F4J6A1)<br>eIF4g ( Q76E23)<br>eIF2b (Q41969) | eIF3g (O75821)<br>eIF4g (O43432)<br>eIF2b (P20042) | 37 / 90<br>28 / 35<br>64 / 58 | RNA transport                                                              |
| Ribosomal proteins<br>L13 (Q9SYL9)<br>L18 (Q9SX68)<br>L24 (P92959)        | L13 (P26373)<br>-<br>L24 (Q96A35)                  | 35 / 46<br>-<br>25 / 48       | Ribosome                                                                   |
| Suppressor of apoptosis<br>Bax Inhibitor (Q9LD45)                         | TMBIM6 (P55061)                                    | 43 / 89                       | Non annotated                                                              |
| Dicer-like proteins<br>DCL4 (P84634)                                      | DICER1 (Q9UPY3)                                    | 30 / 72                       | MicroRNAs in cancer                                                        |
| Chloroplast positioning<br>CHUP1 (Q9LI74)                                 | <i>PPFIBP1 (Q86W92)</i>                            | 22 / 11                       | Non annotated                                                              |
| Cytochrome b6-f complex<br>RISP (Q9ZR03)                                  | UQCRFS1 (P47985)                                   | 56 / 19                       | Oxidative phosphorylation                                                  |
| Cys-rich secretory protein<br>PDLP1 (Q8GXV7)                              | <i>IQSEC3 (Q9UPP2)</i>                             | 63 / 6                        | Endocytosis                                                                |
| SRC2 (O04023)                                                             | <i>GRINA (Q7Z429)</i>                              | 44 / 33                       | Non annotated                                                              |
| Transcription factor<br>FIT (Q0V7X4)                                      | <i>HEY2 (Q9UBP5)</i>                               | 30 / 30                       | Human papillomavirus infection                                             |
| Protein kinase<br>TOR (Q9FR53)<br>S6K1 (P42818)                           | mTOR (P42345)<br>RPS6KB1 (P23443)                  | 37 / 97<br>48 / 68            | mTOR signaling pathway                                                     |
| Regulatory proteins<br>NPR1 (P93002)<br>NPR3 (Q8L746)<br>NPR4 (Q5ICL9)    | ANK2 (Q01484)<br>ABTB1 (Q969K4)<br>NACC2 (Q96BF6)  | 36 / 28<br>34 / 14<br>36 / 12 | Proteoglycans in cancer                                                    |
| DRB4                                                                      | E2AK2 (P19525)<br>ADAR (P55265)                    | 28 / 52<br>28 / 38            | Protein processing in endoplasmic reticulum/ Cytosolic DNA-sensing pathway |

**Table S3:** Proteins interacting with CaMV TAV in plants and corresponding proteins in human. For CaMV TAV interactors in plants, in some cases there is a direct interaction between CaMV and the plant protein, whereas in others the interaction is inferred due to an effect on function. Proteins in bold are highly significant matches (e-value < 10<sup>-10</sup>). Proteins in italics are not significant matches (e-value > 0.001). For each interactor, the most similar human proteins are reported along with the sequence identity and the coverage.

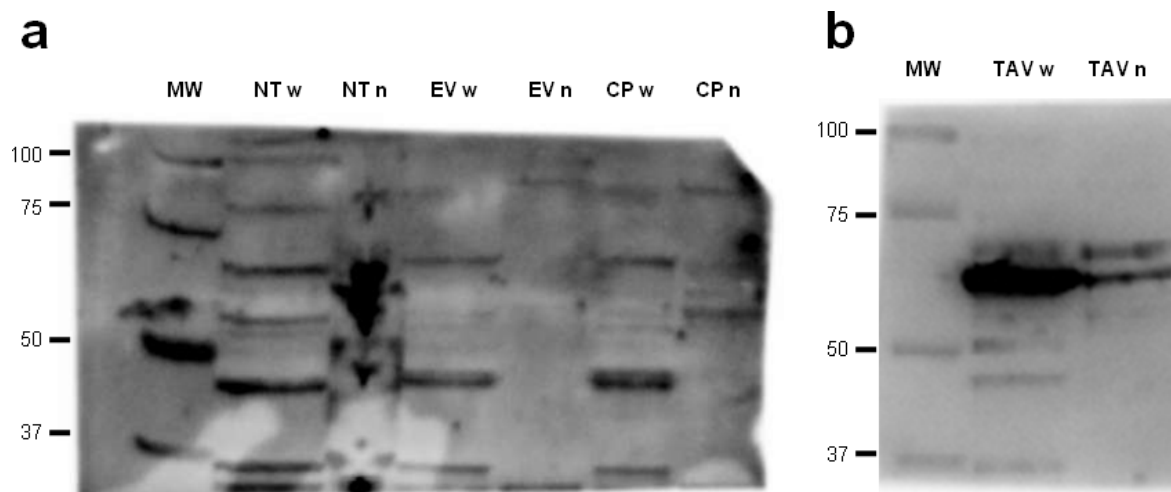

**Figure S1:** Full length blots/gels related to Fig. 2a. **(a)** Full length blot/gel from which 50-75 kDa EV whole (w) and EV nuclear (n) were cropped. Molecular weight (MW, marker) and negative controls cells (not transfected cells, NT w and NT n, and cells transfected with capsid protein, CP w and CP n) have been omitted. **(b)** Full length blot/gel from which 50-75 kDa TAV w and TAV n were cropped. All samples were loaded on the same gel, but we cut the membrane in two **(a, b)** since we first immunoblotted the membrane **a** with anti-CP polyclonal serum and then with anti-TAV polyclonal serum (after stripping). Membrane **b** was tested with anti-TAV polyclonal serum only.

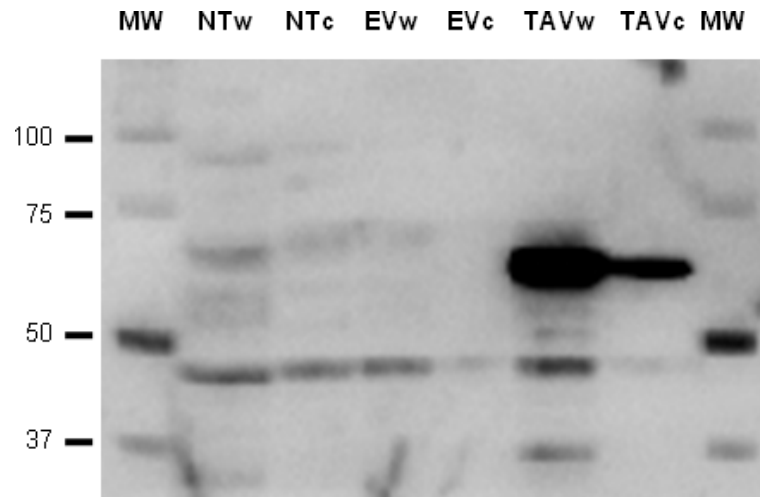

**Figure S2:** Full length blot/gel related to Fig. 2b. Full length blot/gel from which 50-75 kDa EV and TAV, both whole (w) and cytosolic (c), were cropped. Molecular weights (MW, marker) and not trasfected cells, NT w and NT c, have been omitted. This membrane has been immunoblotted with anti-TAV polyclonal serum only.

**a**

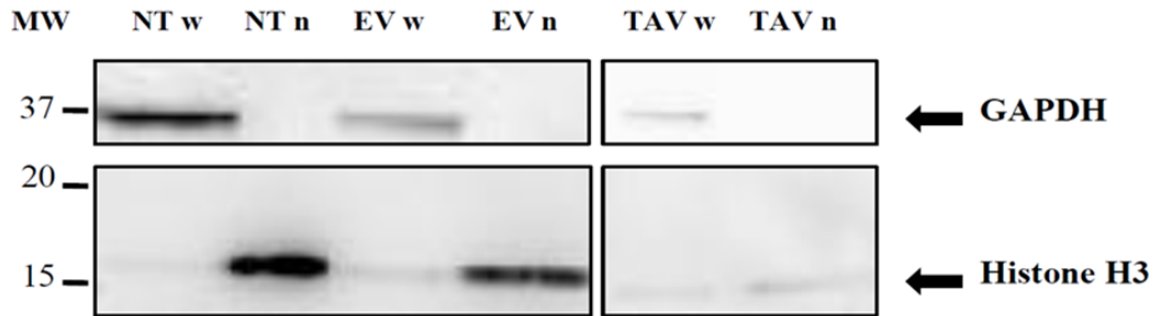

**b**

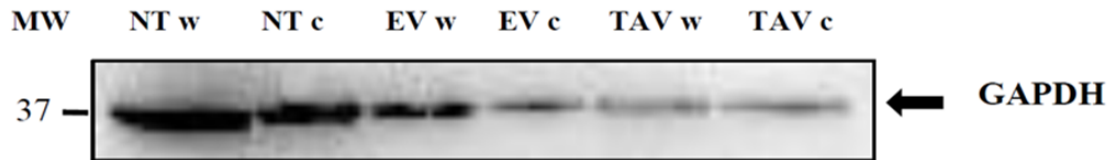

**Figure S3:** Western blot detection of GAPDH and Histone H3 as cytoplasmic/nuclear separation controls. **(a)** GAPDH was used to check for contamination of nuclear fraction and a specific band for GAPDH (37 kDa, cytosolic) was detected in all the samples (not transfected - NT, EV and TAV HEK293T cells) but not in their nuclear fractions, as expected. On the contrary, histone H3 was used to check for contamination of cytosolic fraction and a specific band for histone H3 (17 kDa, nuclear) was detected just in their nuclear fraction, as expected; in TAV, the histone H3 band is weaker than others, but it is present. Arrows indicate the presence of GAPDH and histone H3. Full length blots/gels are presented in Supplementary Figure 4. **(b)** A specific band for GAPDH, used as cytosolic control, was present in all samples (NT, EV and TAV HEK293T cells) both whole and cytosolic, as expected; the band for histone H3 was never detected (data not shown) since that protein was weakly expressed compared to the total protein amount. The letter symbols stand for following: w, whole fraction; n, nuclear fraction; c, cytosolic fraction.

**P1 984 base pairs (bp) - Movement protein (MP)**

MDLYPEENTQSEQSQNSENNMQIFKSENSDGFSSDLMISNDQLKNISKTQLTLEKEKIFKMPNVL<sup>QV</sup>  
MK<sup>KAF</sup>SRKNEILYCVSTKELSVDIHDATGKVYLPITREEINKRLSSLKPEVRKIM<sup>SMV</sup>H<sup>LG</sup>AVKILL  
KA<sup>QFR</sup>NGIDTPIKIALIDDRINSRRDCLLGAAGKNLAYGKFMFTVYPKFGISLNTQRLNQTL<sup>SL</sup>IHD<sup>FE</sup>  
NKNLMNKGDKVMTIT<sup>YIV</sup>GYALTNSHHSID<sup>Y</sup>QSNATIELEDVFQEIGNVQQSD<sup>FC</sup>TIQNDECNWAID<sup>I</sup>  
AQNKALLGAKTQSQIGNSLQIGNSASSNTENELARVSQ<sup>NID</sup>LLKNKLKEIC<sup>GE</sup>

**P3 390 bp - Virion-associated protein (VAP)**

MANLNQIQKEVSEILSDQKSMKSDIKAIL<sup>ELL</sup>GSQNPTKESLEAVA<sup>AKIV</sup>NDLTKLINDCPCNKEILEA  
LGNQPK<sup>QLIE</sup>QPK<sup>KEGK</sup>GLNLGKYTYPNYGV<sup>GNE</sup>EELGSSGNPKALTWP<sup>FKAP</sup>AGWPN<sup>QF</sup>

**P4 1467 bp - Capsid protein (CP)**

MAESILDRTINRFWYNLGEDCLSESQFDLMIRLM<sup>EES</sup>LDGDQIIDLTSLPSDNLQVEQVM<sup>TTT</sup>DD<sup>SIS</sup>  
EESEFLLAIGEISEDES<sup>DS</sup>GEEPEFEQVRMDRTGGT<sup>EIP</sup>KEEDGE<sup>GP</sup>SRYN<sup>ER</sup>K<sup>RRK</sup>TPEDRYFP<sup>TQPK</sup>TI  
PGQKQTS<sup>MGML</sup>NIDCQINRR<sup>TL</sup>IDDWAAEIGLIVK<sup>TN</sup>REDYLD<sup>PET</sup>ILLMEH<sup>KTS</sup>GIA<sup>KEL</sup>IRN<sup>TRW</sup>  
NRTTGD<sup>IEQ</sup>VINAM<sup>Y</sup>TMFLGLNYS<sup>DN</sup>KVAEKID<sup>EQE</sup>KA<sup>KIR</sup>MTKLQ<sup>LF</sup>DICYLEEFTCD<sup>YE</sup>KNMY<sup>K</sup>  
TEMADFP<sup>GY</sup>INQYLSKIP<sup>IGE</sup>KALTRFRHEANGTSI<sup>YSL</sup>GFAAKIVKEELSKIC<sup>DL</sup>SKK<sup>QKK</sup>KK<sup>FNK</sup>  
KCCSIGEASVEYGG<sup>KK</sup>TSKK<sup>KY</sup>HKRYKK<sup>RYK</sup>VYKPYKKKK<sup>KFR</sup>SGKY<sup>FK</sup>PK<sup>EKK</sup>GS<sup>KRKY</sup>CPK<sup>G</sup>  
K<sup>K</sup>DCRC<sup>W</sup>ICNIEG<sup>H</sup>YANEC<sup>P</sup>NRQSSEKAHILQQAENLGLQ<sup>PVE</sup>EPYEGVQEVFILEYKEEEEEET<sup>STEE</sup>  
SDESSTSEDS<sup>SD</sup>SD

**P5 2043 bp - Enzymatic polypeptide (EP)**

MDHLLKTQTQIEQVMN<sup>V</sup>TNPNSIYIKGRLYFKGYKKIELHCFVDT<sup>GASL</sup>CIASKFVIPEEHV<sup>VNAE</sup>  
RPMVKIADGSSITISKVCKDIDLIAGEIFKIPTVYQQESGIDFIIGN<sup>NFC</sup>QLYEPFIQFTDRVIFT<sup>KN</sup>KS<sup>Y</sup>  
PVHITKLTRAVRVGIEGFLESMKKRSKTQQPEPVNISTNKIENPLEEIAILSEGRR<sup>LSEE</sup>KLFTTQ<sup>QRM</sup>Q  
KIEELLEKVCSENPLDPNKTQWMKASIKLSDPSKA<sup>IKV</sup>KPMKYSPMDREEFDKQIKELLDL<sup>KVI</sup>KP  
SKSPHMAPAF<sup>LV</sup>NNEAE<sup>KRRG</sup>K<sup>KR</sup>MVVNYKAMNKATIGDAYNLPNKDELLTL<sup>IRG</sup>K<sup>KI</sup>FSSFDCK<sup>S</sup>  
GFWQVLLDQESRPLTAF<sup>TCPQ</sup>GHYEWN<sup>V</sup>VPFGLKQAPSIFQRHMDEAFRVFRKFCCVYVDDIL<sup>VFS</sup>  
NNEEDHLLHVAMILQKCNQHGI<sup>L</sup>SKKK<sup>AQL</sup>FKKKINFLGLEIDEGTHKPQGHILEHINKFPD<sup>TLE</sup>DK  
KQL<sup>OR</sup>FLGILTYASDYIPKLAQIRK<sup>PL</sup>QAKLKENVPWKWT<sup>KED</sup>TLYMQKVKKNLQGFPLH<sup>HP</sup>PE  
EKLIETDASDDYWGGM<sup>LKA</sup>KINEGTNTELC<sup>RY</sup>ASGSFKAAERNYHSNDKETLAVINTIKKFSI<sup>YLT</sup>  
PVHFLIRTDNTHFKSFVNLNYKGDSKLG<sup>RN</sup>IRWQAWLSHYSFDVEHIK<sup>GT</sup>DNHF<sup>ADFL</sup>SREFN<sup>KVNS</sup>

**Figure S4:** Residues putatively involved in binding DNA and RNA have been predicted with the machine-learning method DP-Bind<sup>20</sup>. Residues predicted to interact with nucleic acids are highlighted in yellow.
